# Supplementary material for: A resolved outflow of matter from a brown dwarf
Source: Springer Nature journal article supplement (doi:10.1038/nature03598), 2005-06-01
Supplement: 41586_2005_BFnature03598_MOESM2_ESM.pdf [file 41586_2005_BFnature03598_MOESM2_ESM.pdf]

Spatial profile of the continuum at marked wavelength

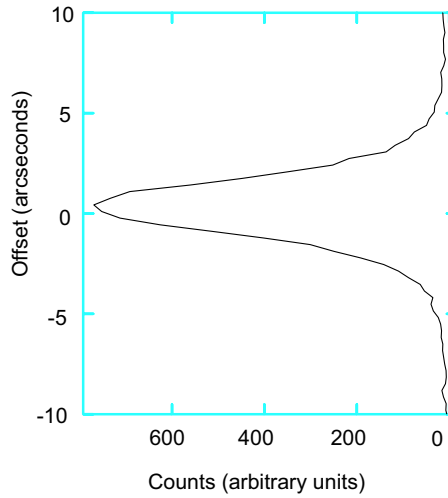

a) Long-slit spectrum of a star with an outflow

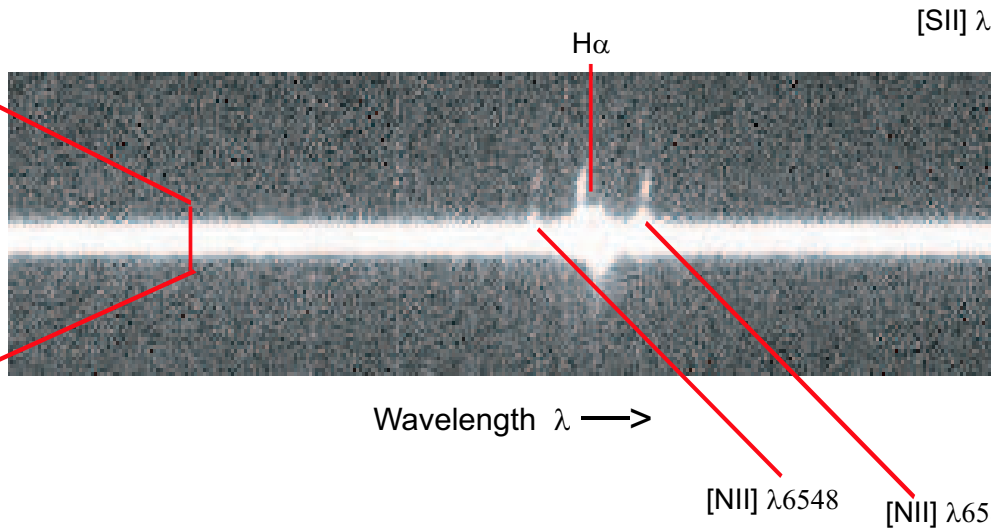

b) Continuum subtracted spectrum

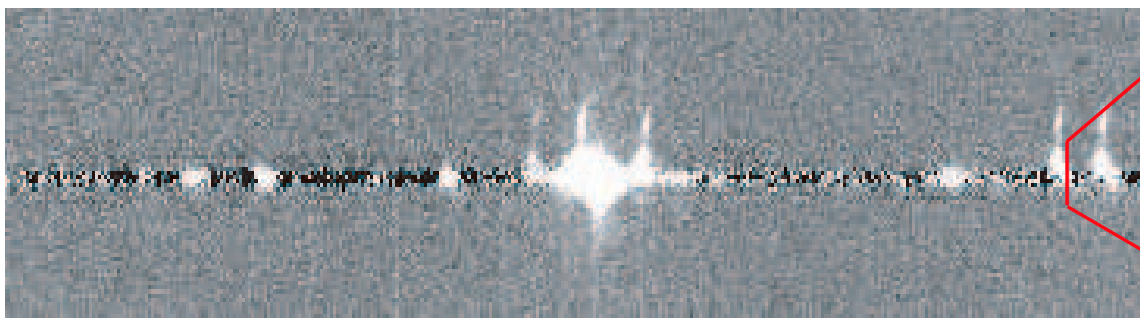

Spatial profile of the  $[SII] \lambda$  emission line region at marked wavelength

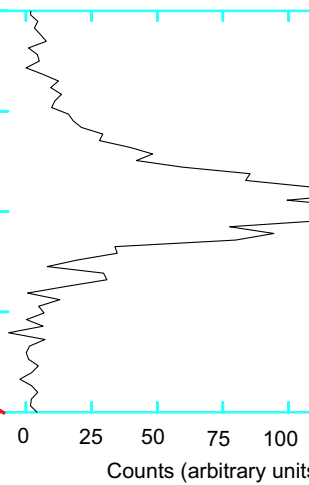

Continuum fitting and removal, using a long-slit spectrum of a typical young star, with an outflow (in this case DG Tau). The extraction of a 1D spatial profile from firstly the continuum emission and then from an emission line region in the continuum subtracted spectrum is illustrated. Note how easily the continuum can be removed leaving the pure line region exposed.
