# Supplementary material for: A resolved outflow of matter from a brown dwarf
Source: Springer Nature journal article supplement (doi:10.1038/nature03598), 2005-06-01
Supplement: 41586_2005_BFnature03598_MOESM3_ESM.pdf [file 41586_2005_BFnature03598_MOESM3_ESM.pdf]

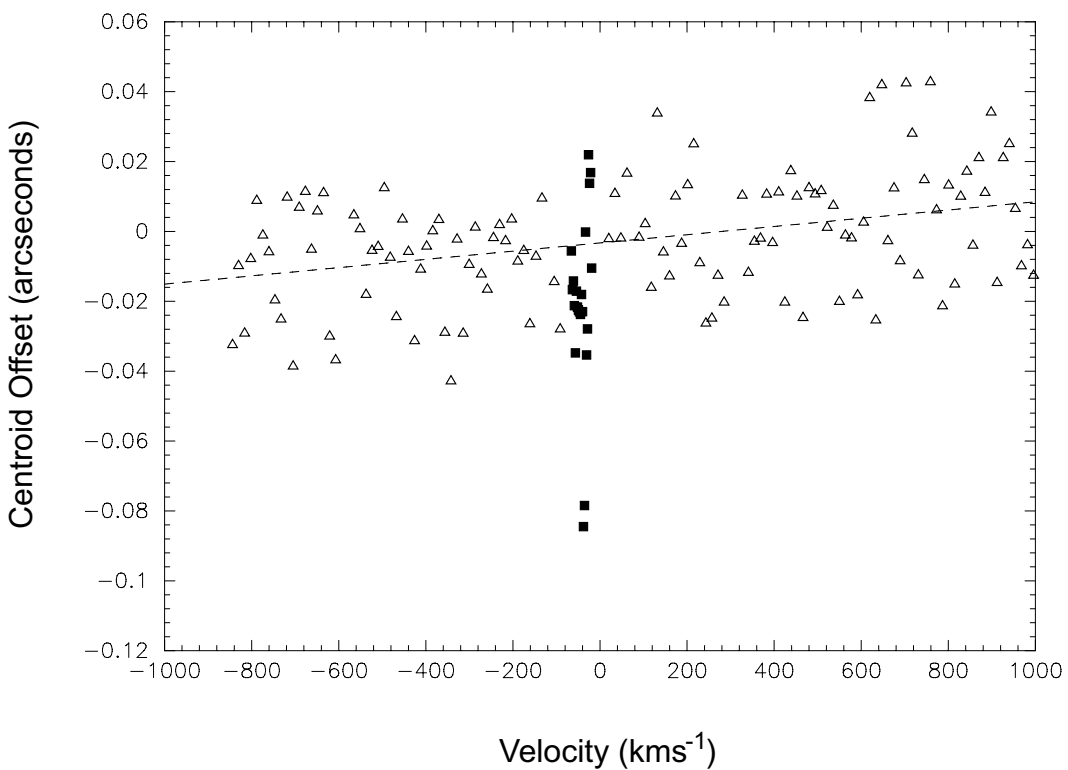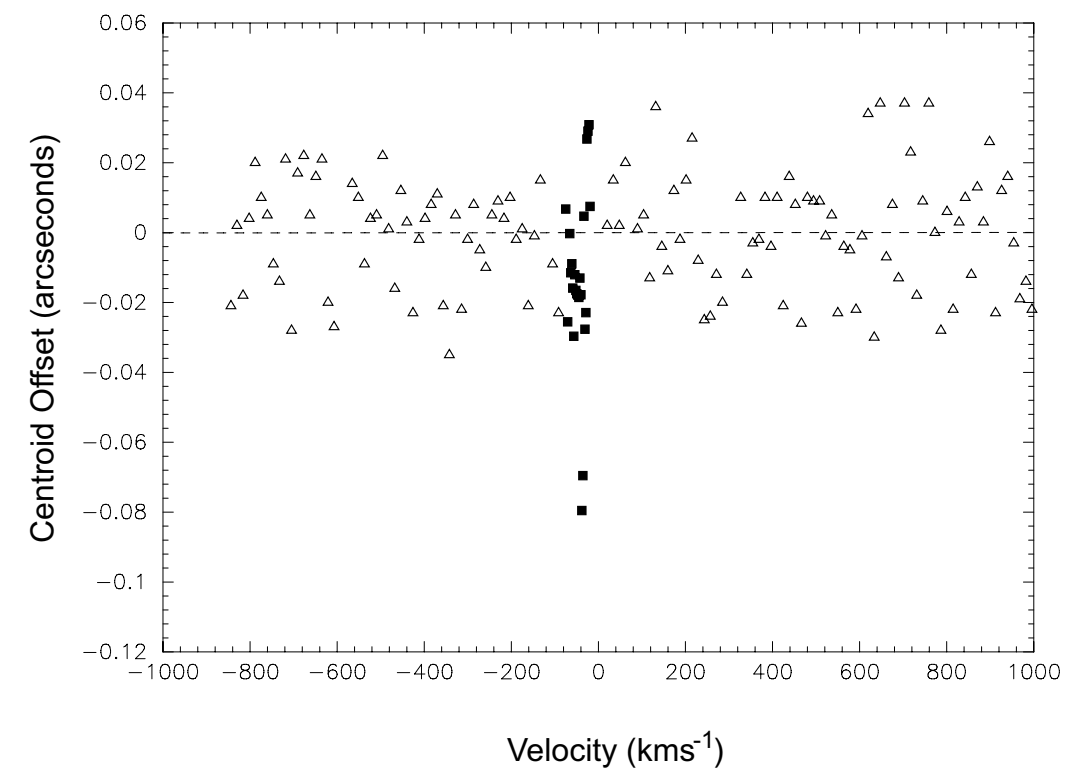

Spectro-astrometric plots in the vicinity of the [OI] $\lambda$ 6300 line of  $\rho$ -Oph 102, before (top) and after (bottom) continuum straightening. Line offsets are measured after the continuum subtraction.
