# Supplementary material for: A resolved outflow of matter from a brown dwarf
Source: Springer Nature journal article supplement (doi:10.1038/nature03598), 2005-06-01
Supplement: 41586_2005_BFnature03598_MOESM4_ESM.pdf [file 41586_2005_BFnature03598_MOESM4_ESM.pdf]

### [OI] $\lambda$ 6300

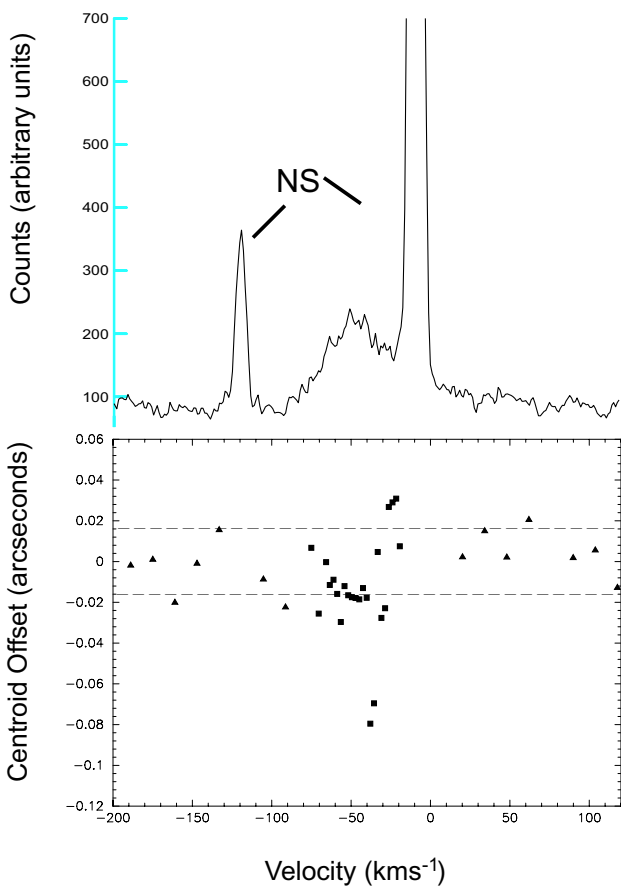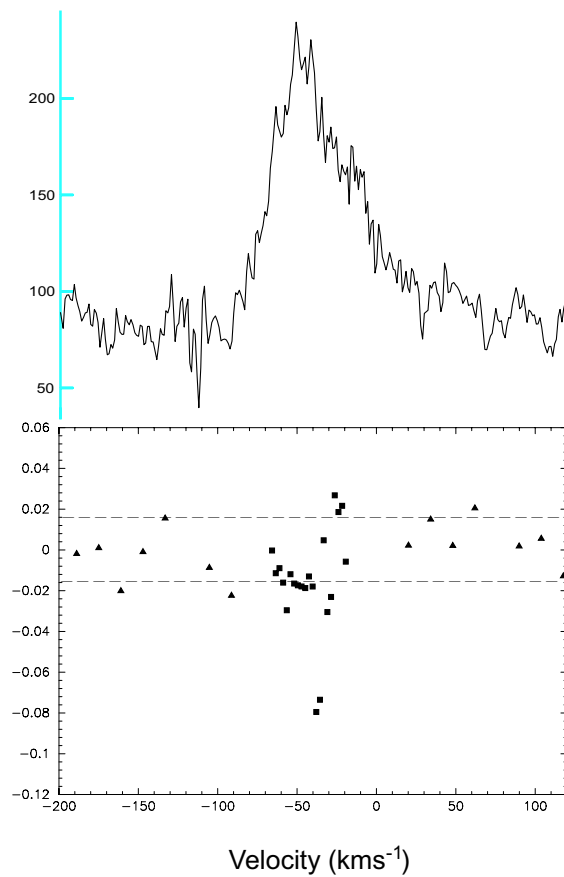

### [OI] $\lambda$ 6363

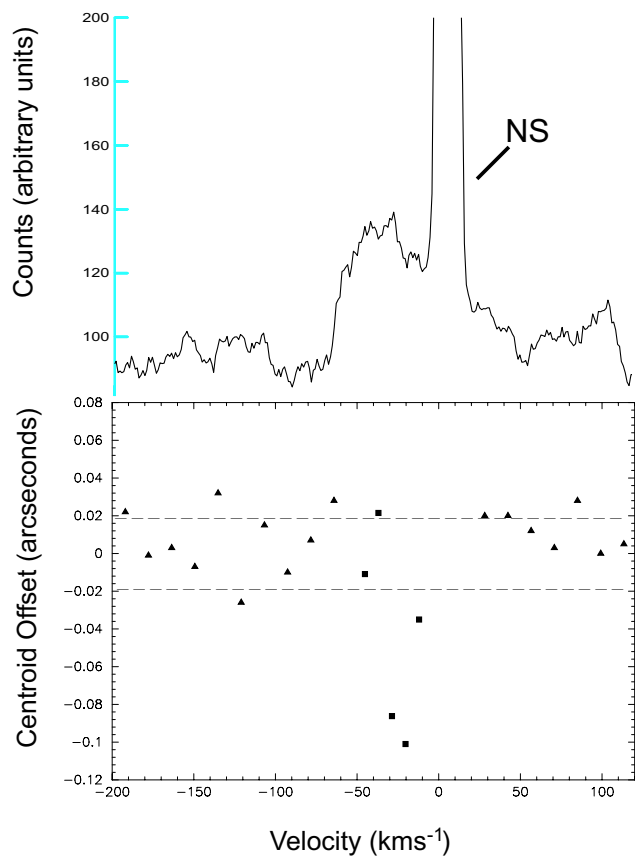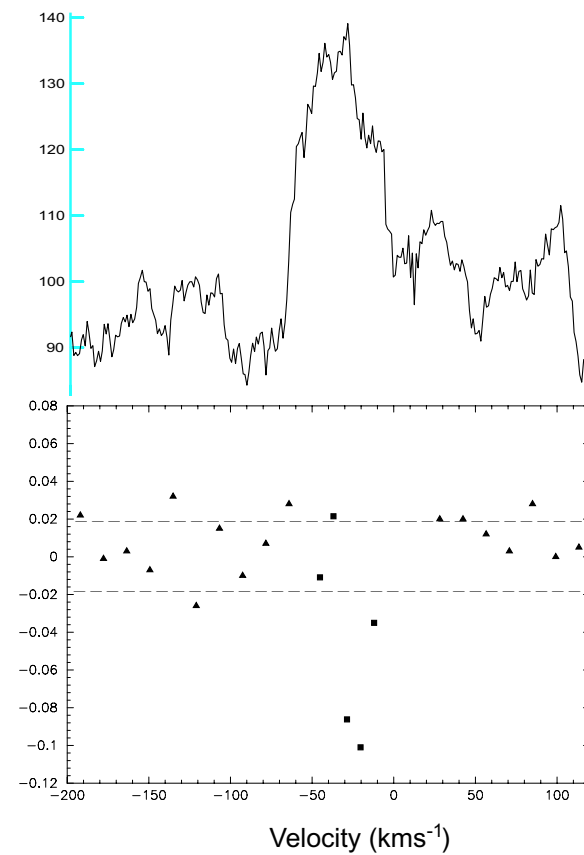

The [OI] $\lambda\lambda$ 6300,6363 emission line regions were initially fitted with the night sky (NS) lines still present (left panel). However in order to check for any contamination by the NS lines to the measured displacements, they were removed as per the continuum subtraction and the residual profiles were then fitted (right panel). There was no difference in the offset of the [OI] $\lambda\lambda$ 6300,6363 lines.
