# Supplementary material for: A resolved outflow of matter from a brown dwarf
Source: Springer Nature journal article supplement (doi:10.1038/nature03598), 2005-06-01
Supplement: 41586_2005_BFnature03598_MOESM6_ESM.pdf [file 41586_2005_BFnature03598_MOESM6_ESM.pdf]

Centroid Offset (arcseconds)

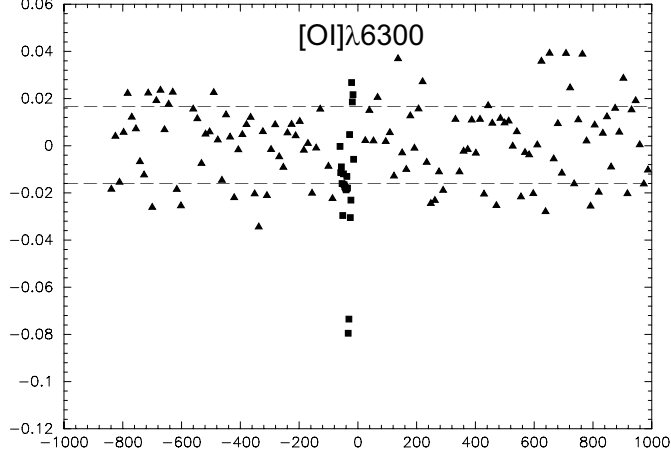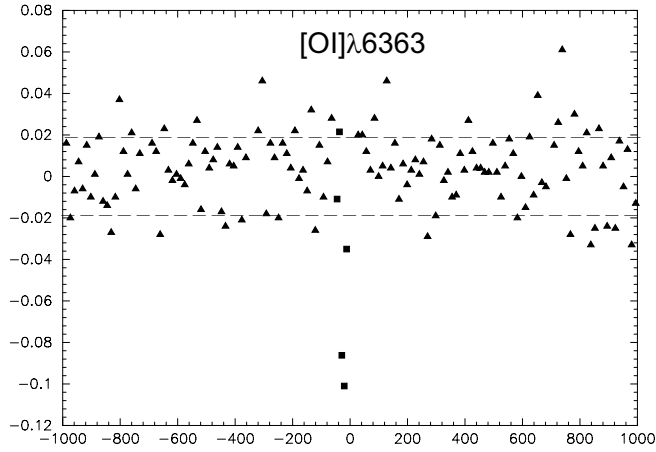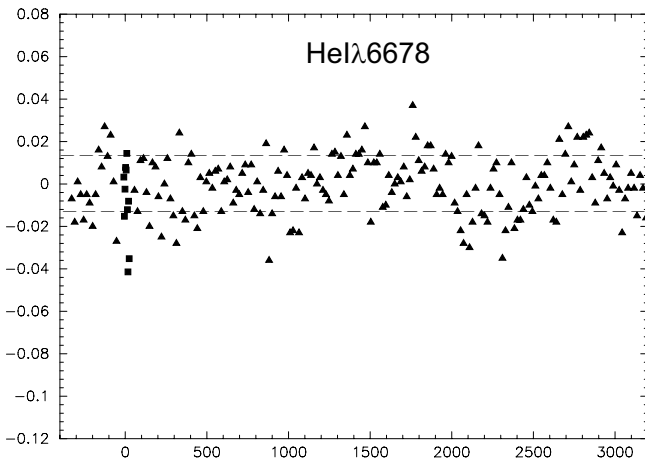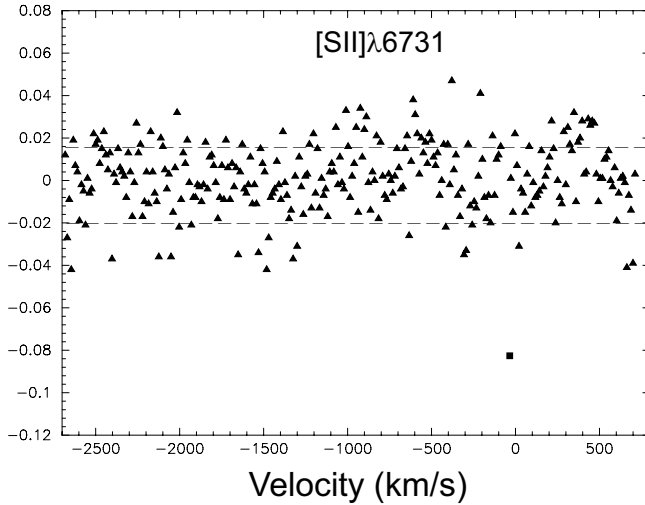

Figure showing the displacement in the [OI] $\lambda$ 6300, 6363, HeI $\lambda$ 6678 and [SII] $\lambda$ 6731 emission line regions, with respect to the continuum measured across a large part of the individual orders. Note that at no other point in any of the lines do the significant displacements measured at the forbidden ELRs occur.
