# Supplementary figures and images for: A resolved outflow of matter from a brown dwarf
Source: Springer Nature journal article supplement (doi:10.1038/nature03598), 2005-06-01

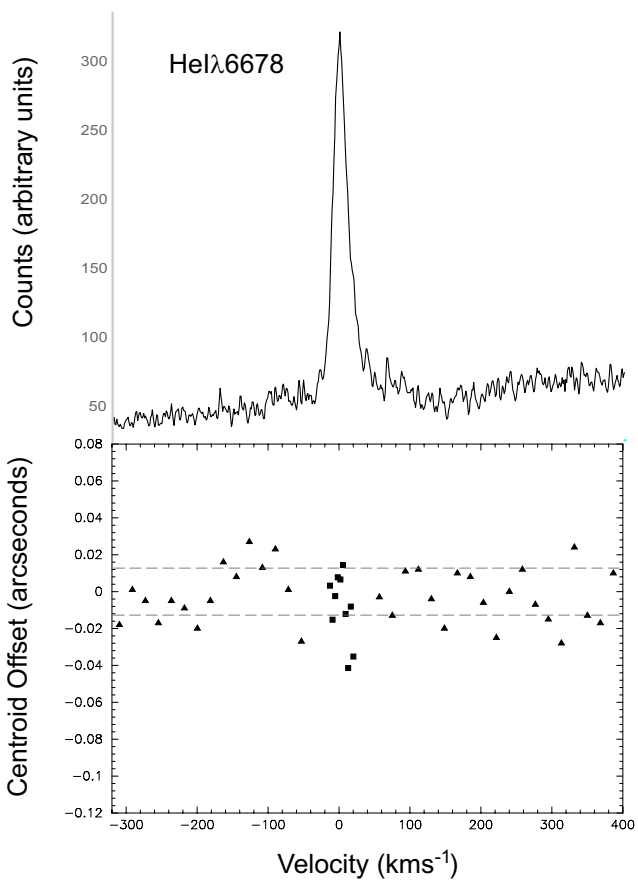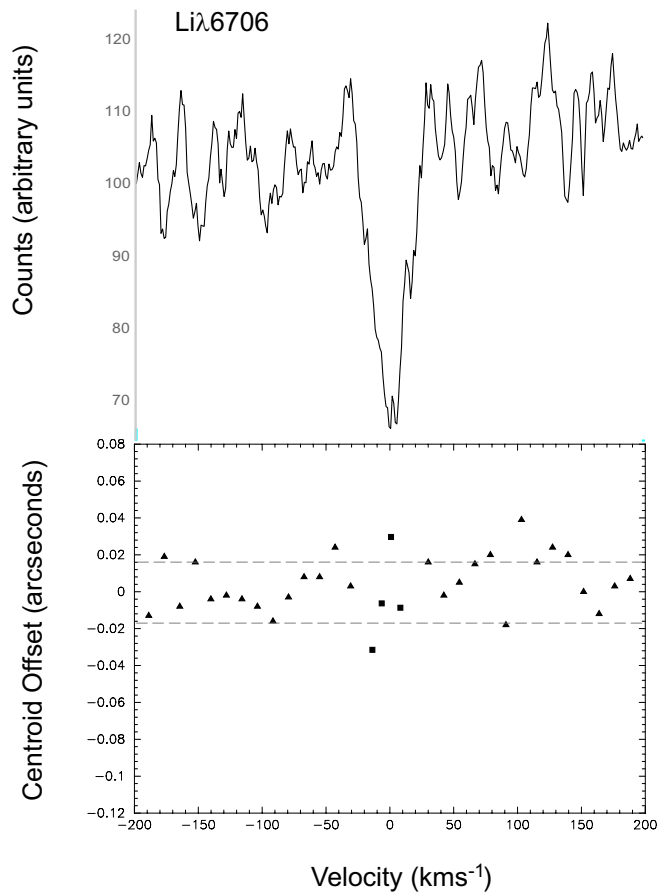

Other lines present in the spectrum included He I  $\lambda 6678$  and Li I  $\lambda 6708$ .

Supplement: 41586_2005_BFnature03598_MOESM5_ESM.pdf [file 41586_2005_BFnature03598_MOESM5_ESM.pdf]
